# Supplementary material
Source: PubMed Central journal article supplement (PMC7994027)
Supplement: NIHMS1679832-supplement-1.pdf [file NIHMS1679832-supplement-1.pdf]

## SUPPLEMENTAL TABLE 1

## Association between physical activity (METs) tertiles and pregnancy loss not limited to women with positive pregnancy tests (N = 1,088).

| Pregnancies (N = 1,088)      | Physical activity T [MET, hours/week] | Cases | Unadjusted RR (95% CI) | Age-adjusted RR (95% CI) | Model 2 <sup>a</sup> RR (95% CI) |
|------------------------------|---------------------------------------|-------|------------------------|--------------------------|----------------------------------|
| Any pregnancy loss (n = 188) | T1 [0–16.6]                           | 59    | Referent               | Referent                 | Referent                         |
|                              | T2 [16.6–49.9]                        | 66    | 1.11 (0.81, 1.53)      | 1.11 (0.80, 1.52)        | 1.11 (0.81, 1.53)                |
|                              | T3 [50.2–275.1]                       | 63    | 1.07 (0.77, 1.48)      | 1.09 (0.78, 1.50)        | 1.09 (0.79, 1.51)                |
| Clinical loss (n = 133)      | T1 [0–16.6]                           | 48    | Referent               | Referent                 | Referent                         |
|                              | T2 [16.6–49.9]                        | 43    | 0.89 (0.61, 1.31)      | 0.88 (0.60, 1.30)        | 0.89 (0.61, 1.31)                |
|                              | T3 [50.2–275.1]                       | 42    | 0.88 (0.59, 1.29)      | 0.90 (0.61, 1.32)        | 0.90 (0.61, 1.33)                |
| hCG-detected loss (n = 55)   | T1 [0–16.6]                           | 11    | Referent               | Referent                 | Referent                         |
|                              | T2 [16.6–49.9]                        | 23    | 2.08 (1.03, 4.20)      | 2.08 (1.03, 4.20)        | 2.05 (1.01, 4.14)                |
|                              | T3 [50.2–275.1]                       | 21    | 1.91 (0.93, 3.90)      | 1.90 (0.93, 3.89)        | 1.89 (0.92, 3.87)                |

Note: CI = confidence interval; MET = metabolic equivalent; RR = risk ratio; W-H ratio = waist-hip ratio.

<sup>a</sup> Model 2 includes age and W-H ratio.

Russo. Physical activity and pregnancy loss. *Fertil Steril* 2019.
